# Supplementary figures and images for: Exosome Component 4 Promotes Epithelial Ovarian Cancer Cell Proliferation, Migration, and Invasion via the Wnt Pathway
Source: PubMed Central journal article supplement (PMC8692763; doi:10.3389/fonc.2021.797968), 2021-12-08

Figure 1C

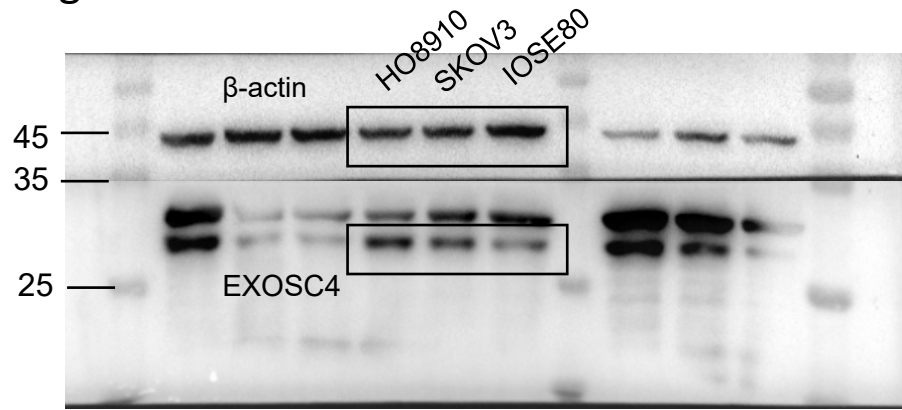

Figure 2C

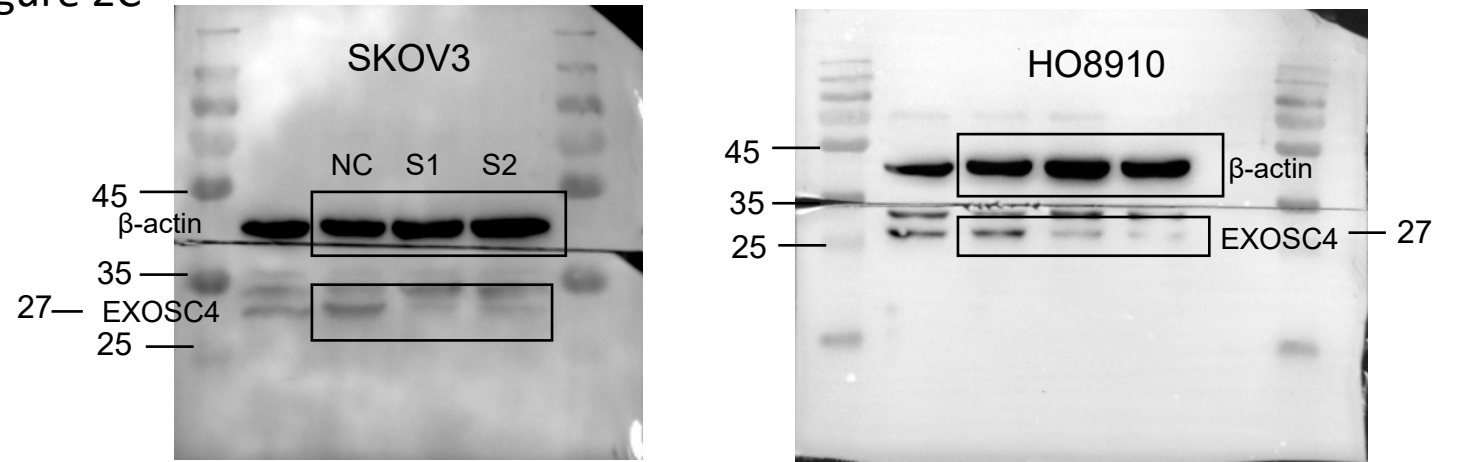

Figure 5A & B

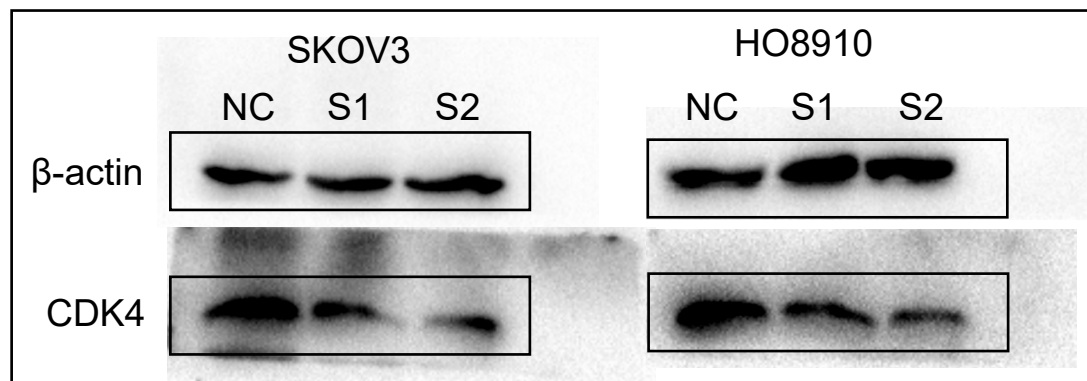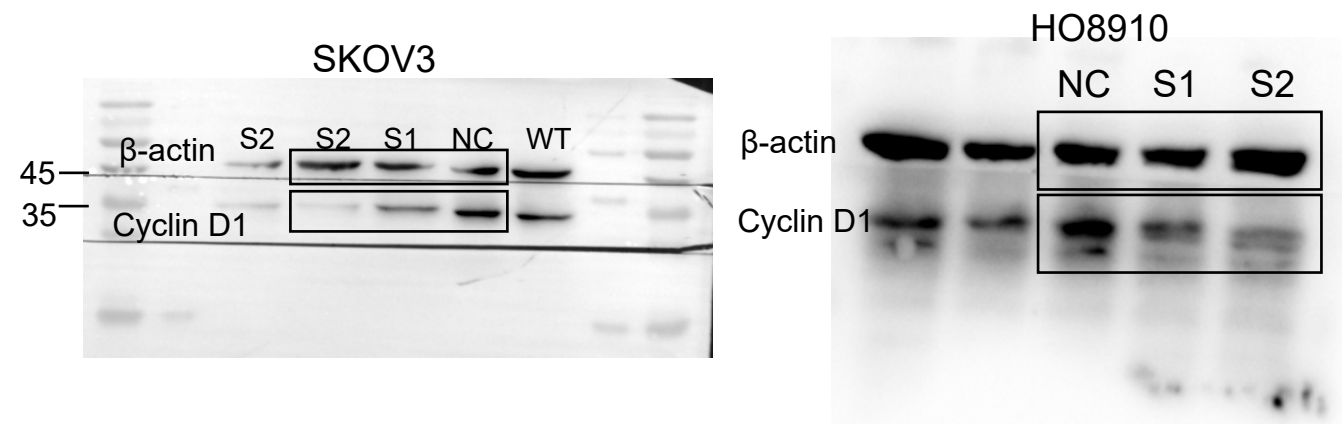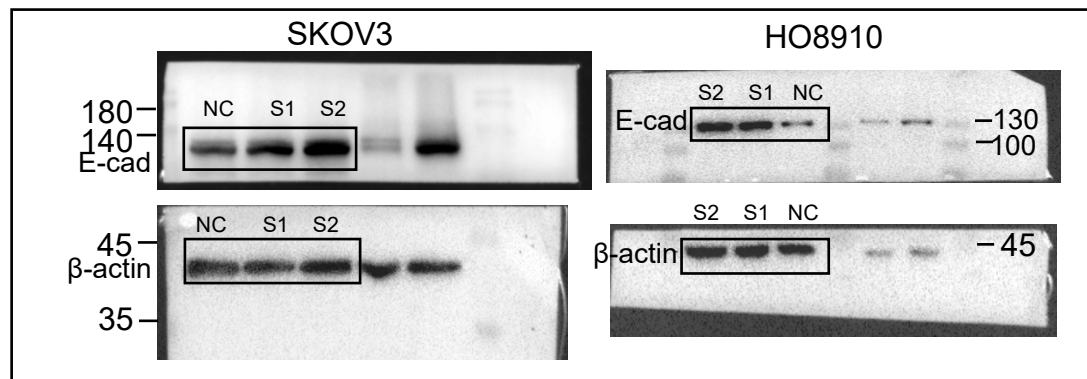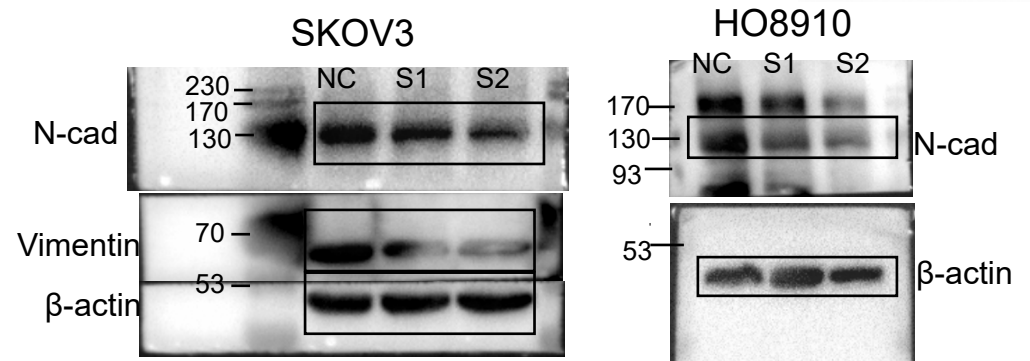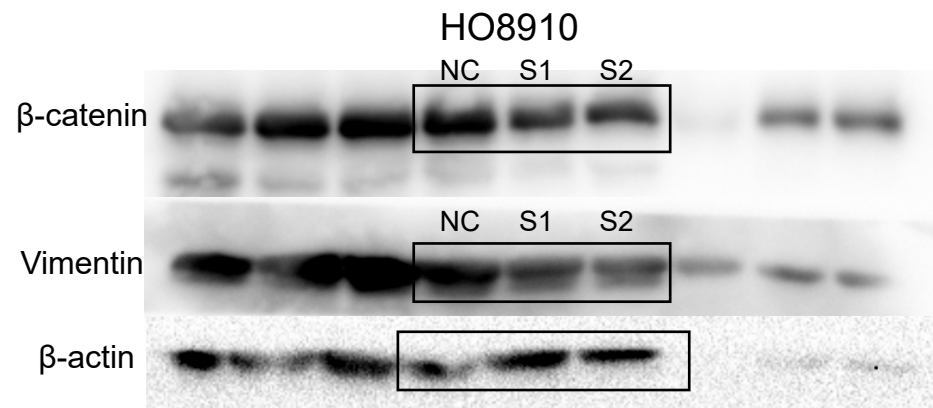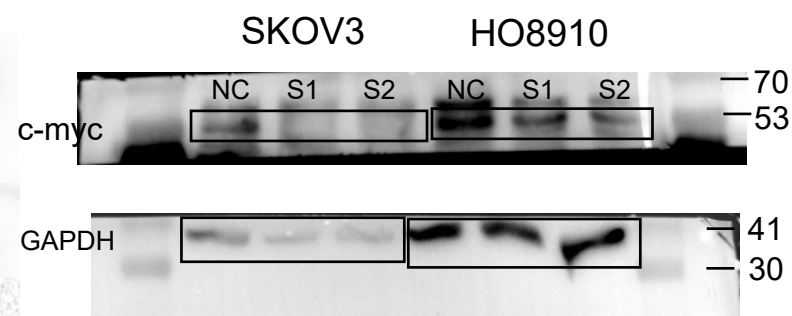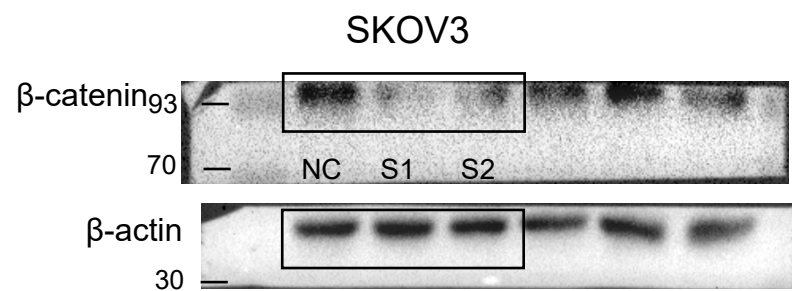

Supplement: DataSheet_1.pdf [file DataSheet_1.pdf]
